# Supplementary material for: Navigating Oxygen Management Challenges amidst COVID-19 pandemic and beyond in India: A Modified Total Interpretive Structural Modeling (m-TISM) Approach
Source: Research Square preprint supplement (doi:10.21203/rs.3.rs-5503121/v1), 2025-04-16
Supplement: Supplementary file 1 [file 168e1652980f8dad4f1130d9.pdf]

## Appendix A. Comprehensive Knowledge Base

| Relationship | Interpretation of the relationship between factors                                                                                                                                | References   |
|--------------|-----------------------------------------------------------------------------------------------------------------------------------------------------------------------------------|--------------|
| F1-F2        | Setting up guidelines and protocols for well-functioning medical equipment to ensure safe and reliable oxygen therapy                                                             | (73–75)      |
| F2-F1        | Ensuring guidelines and protocols are in place for efficient and reliable performance of well-functioning medical equipment                                                       | (74–77)      |
| F1-F5        | Setting up guidelines and protocols for efficient use of medical oxygen to minimize wastage and prioritize critical patients                                                      | (4,78)       |
| F5-F1        | Ensuring guidelines and protocols are in place for the efficient use of medical oxygen to minimize wastage and prioritize critical patients                                       | (4,78)       |
| F9-F1        | Leveraging expertise and resources to ensure the highest quality and purity of medical oxygen and medical equipment procured from other countries and international organizations | (4,10,79,80) |
| F10-F1       | Leveraging expertise and resources to ensure the highest quality and purity of medical oxygen and medical equipment procured from private players                                 | (4,10,79,80) |
| F1-F14       | High technical standards essential for patient safety, efficacy, reliability, and standardization of oxygen therapy care                                                          | (41,81)      |
| F9-F2        | Address the global support for managing shortages in production and availability of medical equipment; international guidelines for usage and maintenance                         | (4,82,83)    |
| F10-F2       | Incentivize private players to address the shortage of medical equipment, improve accessibility and quality, enhance maintenance and repair services                              | (84,85)      |
| F2-F14       | Sufficient availability and proper functioning of medical equipment required for ensuring safe, efficient, and timely access to medical oxygen to patients                        | (86,87)      |
| F4-F3        | Keeping a check of licensing and permits, imports and exports, quality of medical oxygen, pricing, and other aspects to ensure oxygen is available to those in need               | (56,69)      |
| F3-F6        | Reduce delays, wait times, and disruptions in the supply chain of medical oxygen that is produced                                                                                 | (3,4,57)     |
| F3-F7        | Minimize inefficiencies, mismanagement, and disparities in oxygen management by acquiring oxygen supplies when existing capacity is insufficient                                  | (3,4,9)      |
| F11-F3       | Accurate and real-time understanding and information about the demand and supply of medical oxygen required and available                                                         | (25,88)      |

|        |                                                                                                                                                                                                                      |              |
|--------|----------------------------------------------------------------------------------------------------------------------------------------------------------------------------------------------------------------------|--------------|
| F3-F12 | Keep a check on existing capacity to plan and prepare for any unforeseen increase in oxygen demand in the future                                                                                                     | (77,89,90)   |
| F12-F3 | Necessary oxygen supply in place to ensure to meet the steep rise in demand for oxygen therapy during the crises and in future contingencies                                                                         | (89,101,102) |
| F4-F11 | Information and guidance about the standards for the quality, safety, and efficacy of oxygen supplies as well as monitoring to respond effectively in a crisis                                                       | (91,92)      |
| F11-F4 | Ensuring compliance with guidelines, protocols, and regulations to be prepared and equipped to deal with contingencies and crises                                                                                    | (4,91,92)    |
| F4-F12 | Safe and effective management of oxygen to reduce shortages, contingency planning to be prepared to respond to any steep rise in demand                                                                              | (93,94)      |
| F4-F13 | Rapid deployment of digital technologies for implementation, management, and monitoring of oxygen therapy                                                                                                            | (79,92)      |
| F10-F5 | Ensure availability of oxygen to reduce the burden on the public healthcare system's oxygen supplies; pool resources, expertise, and knowledge to improve the availability and distribution while minimizing wastage | (4,95)       |
| F5-F14 | Prioritize oxygen allocation to critical cases and minimize wastage of medical oxygen                                                                                                                                | (16,23)      |
| F6-F7  | Effectively and efficiently secure and distribute essential oxygen supplies that need to reach the final health facilities in a cost-effective and timely manner                                                     | (3,4,98)     |
| F7-F6  | Ensure that the logistics network is well-stocked with the required resources and supplies in a cost-effective manner                                                                                                | (3,4,86)     |
| F6-F8  | Providing resources, supplies, and training needed by frontline workers to perform their jobs effectively                                                                                                            | (60,96,97)   |
| F8-F6  | Capacity building and training programs for frontline workers to ensure staff has sufficient skills and knowledge to manage the distribution of oxygen supplies in crises                                            | (60,96)      |
| F6-F9  | More international collaborations to develop new distribution systems to improve the efficiency and speed of oxygen delivery. E.g. Air bridges, solidarity oxygen express                                            | (4,9)        |
| F6-F10 | More PPP to manage logistics; more effective response in logistics management by the private sector                                                                                                                  | (9,98)       |
| F12-F6 | Planning and forecasting oxygen demand for drawing up an elastic oxygen supply chain and distribution system                                                                                                         | (65,99)      |
| F13-F6 | Plethora of digital tools and platforms to map and distribute oxygen supplies                                                                                                                                        | (4,57)       |

|         |                                                                                                                                                                                                           |            |
|---------|-----------------------------------------------------------------------------------------------------------------------------------------------------------------------------------------------------------|------------|
| F7-F9   | Procurement and acquisition strategies for acquiring oxygen generation and storage capacity from other countries through imports or donations                                                             | (13,100)   |
| F7-F10  | Procurement and acquisition strategies for acquiring oxygen generation and storage capacity within the country through private sources; incentivize MSMEs and private players                             | (13,101)   |
| F12-F7  | Track, identify, and forecast procurement needs for medical oxygen, equipment, and consumables (vis a vis existing capacity)                                                                              | (4,102)    |
| F8-F10  | Collaborations with the private sector to ensure healthcare workers have the skills, knowledge, and resources required to manage oxygen supplies effectively                                              | (4,68)     |
| F12-F8  | Training staff for any future crises, oxygen therapy ecosystem, SOPs, and guidelines on various aspects of clinical treatment of patients on oxygen therapy                                               | (65,103)   |
| F13-F8  | Medical and paramedical staff and volunteers provided training through digital tools and learning management systems; to have appropriate knowledge and skills to treat patients requiring oxygen therapy | (104,105)  |
| F9-F10  | Bringing together the resources, expertise, and knowledge of both public and private sector organizations and other countries as well as international organizations                                      | (4,66,106) |
| F10-F9  | Bringing together the resources, expertise, and knowledge of both public and private sector organizations and other countries as well as international organizations                                      | (4,15,66)  |
| F11-F12 | Early detection of oxygen needs will help in proactive planning and management of the contingencies; and allow more response time to mitigate the impact                                                  | (107–109)  |
| F11-F13 | Setting up digital tools to enable active monitoring of oxygen demand and supply                                                                                                                          | (109,110)  |
| F12-F13 | Setting up digital tools to enable a more strategic and effective oxygen response                                                                                                                         | (111,112)  |
| F13-F12 | Effective planning and forecasting of oxygen demand and landscaping oxygen production capabilities; active monitoring of essential commodities                                                            | (111–113)  |
