# Supplementary material for: Navigating Oxygen Management Challenges amidst COVID-19 pandemic and beyond in India: A Modified Total Interpretive Structural Modeling (m-TISM) Approach
Source: Research Square preprint supplement (doi:10.21203/rs.3.rs-5503121/v1), 2025-04-16
Supplement: Supplementary file 2 [file 24622a93d882577ac23f13fa.pdf]

Questionnaire for the study (*Slight modifications were made for every participant depending on their roles*)

#### Background and Experience:

- Can you provide a brief overview of your role during the COVID-19 pandemic and how did you see the overall situation of medical oxygen management during the pandemic?
- What were the major challenges faced during first and second wave in COVID-19 in ensuring an adequate supply of medical oxygen? and how they were addressed
- What were the factors that led to improved oxygen management? Which ones do you think were critical?

#### Government of India's Role:

- What were the policy measures or initiatives taken by the government of India which you considered were critical to address the shortage of medical oxygen during the COVID-19 crisis?
- What were the notable successes or shortcomings?

#### Digital Interventions

- What kind of challenges are addressed by these digital interventions? (operational/infrastructure/human resource) and what were the problems in adopting and implementing these digital tools? (in terms of first and second wave)
- What kind of specific digital interventions you and your team implemented/using in oxygen management?
- How do you see the availability, accessibility, affordability, accountability, and scalability aspect of these digital interventions in oxygen management?
- Please comment on the availability aspect of these digital interventions/technologies in oxygen management
- Please comment on the accessibility aspect of these digital interventions/tech at various levels (developer/user-hospitals/monitoring-supervision/etc.)
- Please comment on the affordability aspect of these digital interventions/tech (cost-effectiveness. Infrastructure, etc.)
- Please comment on the accountability aspect of these digital interventions/tech at various levels (vendor/buyer/user/maintenance/etc.)
- Please comment on the scalability aspect of this digital intervention/tech at various levels

#### Public-Private Collaborations:

- Was there any kind of public-private collaboration in dealing with challenges/improving oxygen management related to your roles and responsibilities
- How crucial were the roles of the public and private sector in addressing the challenges related to medical oxygen availability? And how would they see their interdependence and interrelationships?
- What were the key factors that facilitated or hindered collaboration between public and private entities in oxygen management?

- Reflecting on the overall impact of public-private collaborations in oxygen management, what do you think was the most significant contribution to addressing the challenges faced during the COVID-19 pandemic?

Recommendations for Future Preparedness:

- What recommendations do you have for improving oxygen management systems in India, considering the lessons learned from the COVID-19 pandemic? In your experience, how does the situation in India compare to other countries in terms of oxygen management during the pandemic?
- How can public-private collaborations and digital interventions be strengthened to enhance preparedness for future health crises?
- In this context, were there any best practices that India has or can adopt from other countries?
